# Supplementary material for: Targeting the prefrontal-supplementary motor network in obsessive-compulsive disorder with intensified electrical stimulation in two dosages: a randomized, controlled trial
Source: PubMed Central journal article supplement (PMC10844238; doi:10.1038/s41398-024-02736-y), 2024-02-05

**1-mA group Vs. Sham**

*non-parametric permutation independent t-test on **Post-Intervention** condition results*

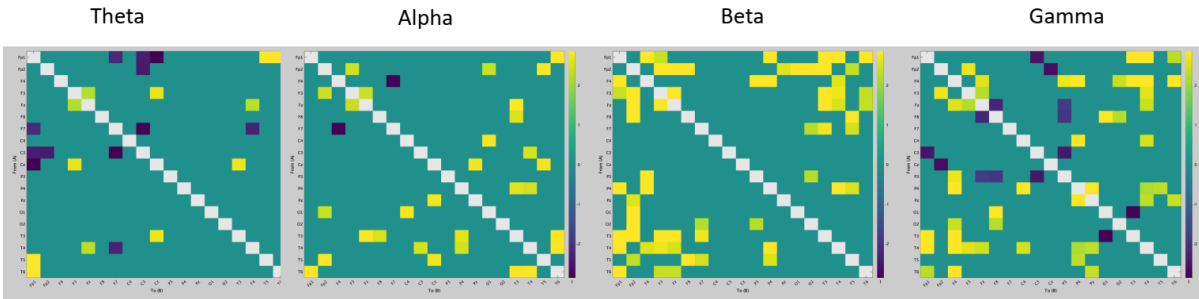

**2-mA group Vs. Sham**

*non-parametric permutation independent t-test on **Post-Intervention** condition results*

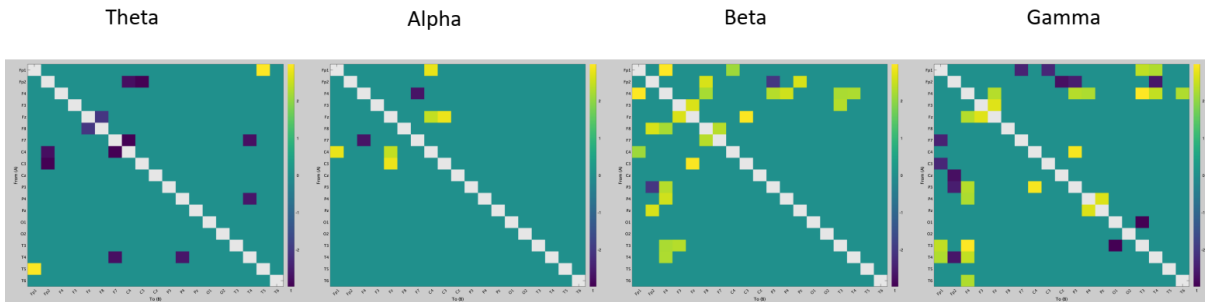

**2-mA group Vs. 1-mA group**

*non-parametric permutation independent t-test on **Post-Intervention** condition results*

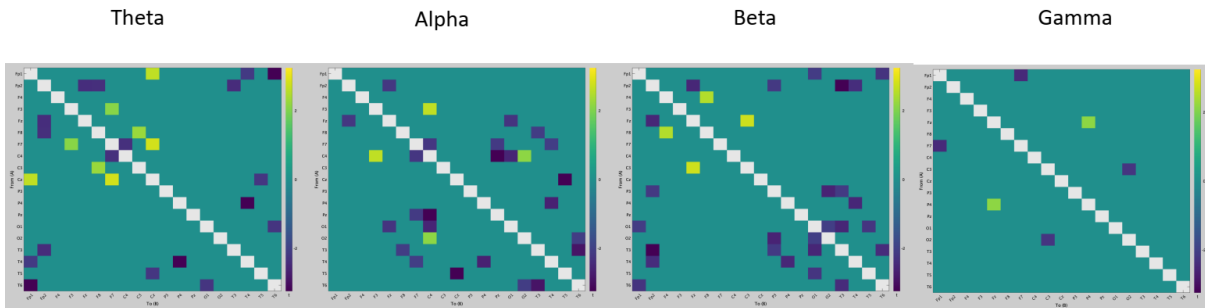

Supplement: 41398_2024_2736_MOESM3_ESM.pdf [file 41398_2024_2736_MOESM3_ESM.pdf]
